# Supplementary material for: Proposal and Design of Flexible All-Polymer/CIGS Tandem Solar Cell
Source: MDPI journal article supplement (doi:10.3390/polym15081823), 2023-04-08
Supplement: s1 [file s1]

# Supplementary Material

## Proposal and Design of Flexible All-Polymer/CIGS Tandem Solar Cell

Tarek I. Alanazi and Mona El Sabbagh

**Table S1.** Main factors of the top and back metal contacts for polymer and CIGS cells.

|              | Contact     | Material | Work function (eV) | Electron surface recombination velocity (cm/s) | Hole surface recombination velocity (cm/s) |
|--------------|-------------|----------|--------------------|------------------------------------------------|--------------------------------------------|
| Polymer cell | Front metal | ITO      | 4.8                | $1 \times 10^7$                                | $1 \times 10^6$                            |
|              | Back metal  | Ag       | 3.72               | $1 \times 10^6$                                | $1 \times 10^7$                            |
| CIGS cell    | Front metal | ITO      | 4.7                | $1 \times 10^7$                                | $1 \times 10^6$                            |
|              | Back metal  | Mo       | 5.5                | $1 \times 10^6$                                | $1 \times 10^7$                            |

**Table S2.** Defects parameters at the interfaces of polymer cell.

|                                                     | PEDOT:PSS/Polymer     | Polymer/PDINN       |
|-----------------------------------------------------|-----------------------|---------------------|
| Defect type                                         | Neutral               | Neutral             |
| Electron capture cross section (cm <sup>2</sup> )   | $3.2 \times 10^{-16}$ | $1 \times 10^{-15}$ |
| Hole capture cross section (cm <sup>2</sup> )       | $1 \times 10^{-15}$   | $8 \times 10^{-16}$ |
| Energetic distribution                              | Single                | Single              |
| Energy level with respect to the highest $E_v$ (eV) | 0.6                   | 0.6                 |
| Total density (cm <sup>-2</sup> )                   | $2.5 \times 10^{11}$  | $1 \times 10^{11}$  |

**Table S3.** Trap states parameters for the PM7:PIDT, CIGS and CdS layers used in device simulation.

| Parameter                                   | PM7:PIDT            | CIGS                | CdS                 |
|---------------------------------------------|---------------------|---------------------|---------------------|
| Defect type                                 | Donor               | Donor               | Acceptor            |
| Energetic distribution                      | Single              | Single              | Single              |
| Capture cross section (cm <sup>2</sup> )    | $1 \times 10^{-15}$ | $1 \times 10^{-15}$ | $1 \times 10^{-15}$ |
| Energy level (eV)                           | 0.88 (above $E_v$ ) | 0.57 (above $E_v$ ) | 1.2 (above $E_v$ )  |
| Total density ( $N_t$ ) (cm <sup>-3</sup> ) | $1 \times 10^{10}$  | $1 \times 10^{13}$  | $1 \times 10^{12}$  |

**Table S4.** Basic parameters of CdZnS and CBTS layers.

| Parameters                                         | CdZnS [S1]           | CBTS [S2]            |
|----------------------------------------------------|----------------------|----------------------|
| Thickness (nm)                                     | 30                   | 30                   |
| Energy gap (eV)                                    | 3.18                 | 1.9                  |
| Electron affinity (eV)                             | 3.71                 | 3.6                  |
| Relative permittivity                              | 10                   | 5.4                  |
| Electron mobility (cm <sup>2</sup> /Vs)            | 340                  | 30                   |
| Hole mobility (cm <sup>2</sup> /Vs)                | 50                   | 10                   |
| CB effective density of states (cm <sup>-3</sup> ) | 2.5×10 <sup>18</sup> | 2.2×10 <sup>18</sup> |
| VB effective density of states (cm <sup>-3</sup> ) | 2.5×10 <sup>19</sup> | 1.8×10 <sup>19</sup> |
| Shallow donor density $N_D$ (cm <sup>-3</sup> )    | 5×10 <sup>18</sup>   | -                    |
| Shallow acceptor density $N_A$ (cm <sup>-3</sup> ) | -                    | 5×10 <sup>18</sup>   |

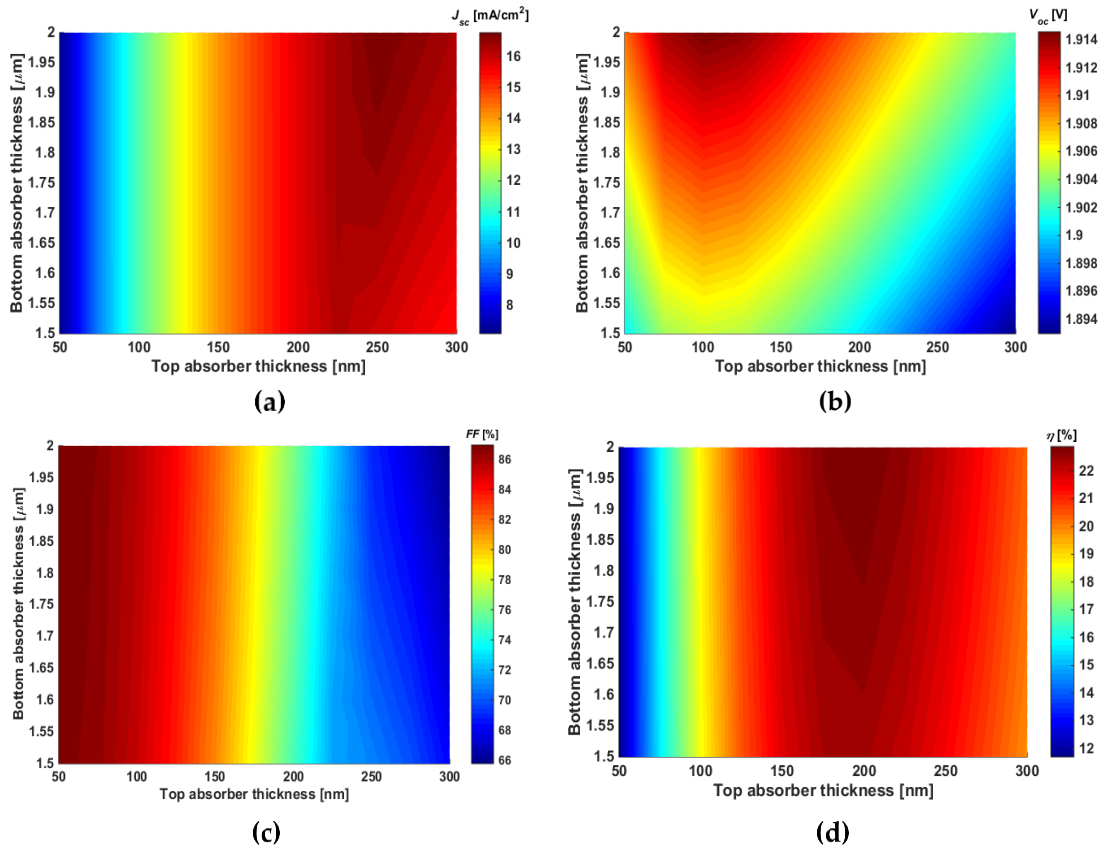

**Figure S1.** Performance parameters dependency on top and bottom absorber thicknesses.

Regarding the dependence of  $V_{oc}$  on the intensity ( $I$ ), it can be given as [S3],

$$V_{oc} = \varepsilon V_T \ln(I) + \text{constant} \quad (S1)$$

Where  $V_T$  is the thermal voltage and  $\varepsilon$  is the ideality factor [S4]. It was realized that the solar cell displays extra SRH recombination rates when  $\varepsilon$  is more than one [S5, S6]. The values of  $\varepsilon$  were determined as 1.973 and 1.823 for initial and optimized TSCs, respectively as shown in Figure S2.

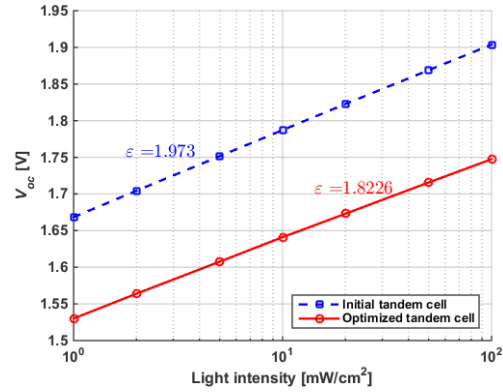

**Figure S2.** Dependence of  $V_{oc}$  on the incident light intensity.

## References

- [S1] Salem, M.S.; Shaker, A.; Othman, M.S.; Al-Bagawia, A.H.; Fedawy, M.; Aleid, G.M. Numerical analysis and design of high performance HTL-free antimony sulfide solar cells by SCAPS-1D. *Optical Materials* **2022**, *123*, 111880.
- [S2] Hossain, M.K.; Rubel, M.H.K.; Toki, G.I.; Alam, I.; Rahman, M.F.; Bencherif, H. Effect of various electron and hole transport layers on the performance of CsPbI<sub>3</sub>-based perovskite solar cells: A numerical investigation in DFT, SCAPS-1D, and wxAMPS frameworks. *ACS Omega* **2022**, *7*(47), 43210-43230.
- [S3] Leong, W.L.; Ooi, Z.E.; Sabba, D.; Yi, C.; Zakeeruddin, S.M.; Graetzel, M.; Gordon, J.M.; Katz, E.A.; Mathews, N. Identifying Fundamental Limitations in Halide Perovskite Solar Cells, *Adv. Mater.* **2016**, *28*, 2439–2445.
- [S4] Zhang, H.; Cheng, J.; Lin, F.; He, H.; Mao, J.; Wong, K.S.; Jen, A.K.Y.; Choy, W.C.H. Pinhole-free and surface-nanostructured niox film by room-Temperature solution process for high-performance flexible perovskite solar cells with good stability and reproducibility, *ACS Nano* **2016**, *10*, 1503–1511.
- [S5] Kyaw, A.K.K.; Wang, D.H.; Gupta, V.; Leong, W.L.; Ke, L.; Bazan, G.C.; Heeger, A.J. Intensity dependence of current–voltage characteristics and recombination in high-efficiency solution-processed small-molecule solar cells. *ACS Nano* **2013**, *7*(5), 4569-4577.
- [S6] Salem, M.S.; Shaker, A.; Abouelatta, M.; Alanazi, A.; Al-Dhlan, K.A.; Almurayziq, T.S. Numerical analysis of hole transport layer-free antimony selenide solar cells: Possible routes for efficiency promotion. *Optical Materials* **2022**, *129*, 112473.
